# Supplementary material for: Codon-Optimization of Wild-Type Adeno-Associated Virus Capsid Sequences Enhances DNA Family Shuffling while Conserving Functionality
Source: PubMed Central journal article supplement — Mol Ther Methods Clin Dev. 2018 Nov 1;12:71–84. doi: 10.1016/j.omtm.2018.10.016 (PMC6279885; doi:10.1016/j.omtm.2018.10.016), 2018-11-01
Supplement: mmc1.pdf [file mmc1.pdf]

## **Supplemental Information**

### **Codon-Optimization of Wild-Type Adeno-Associated**

### **Virus Capsid Sequences Enhances DNA Family**

### **Shuffling while Conserving Functionality**

**Marti Cabanes-Creus, Samantha L. Ginn, Anais K. Amaya, Sophia H.Y. Liao, Adrian Westhaus, Claus V. Hallwirth, Patrick Wilmott, Jason Ward, Kimberley L. Dilworth, Giorgia Santilli, Arkadiusz Rybicki, Hiroyuki Nakai, Adrian J. Thrasher, Adrian C. Filip, Ian E. Alexander, and Leszek Lisowski**

### **Supplementary Figure S1. Schematic representation of localized codon-optimization (LCO).**

The upper panel represents schematic of wtAAV donors and sample alignment of fragment of *cap* sequence from AAV2, AAV5 and AAV6 showing DNA and amino acid sequences. Vertical lines indicate positions with same residues, while \* represents mismatches at the DNA level. DNA residues modified using LCO algorithm are shown in purple in the lower panel.

### **Supplementary Figure S2. Schematic illustration of AAV library selection protocol.**

At each round of selection cells were infected with the library at various MOIs. QPCR was used to identify dilution (shown as tubes 1, 2 and 3, where tube 1 has the highest MOI) with the lowest MOI that led to detectable library amplification, when compared to cells infected with the library at same MOI but without wtAd5 co-infection.

### **Supplementary Figure S3. Sequences of AAV capsids used in the study optimized using canonical codon-optimization (hcoAAV).**

**Supplementary Figure S4. Alignment of AAP coding regions from wild type and LCO AAV1 and AAV2.** Alignment performed using Clustal Omega tool. Asterisk “\*” indicates positions with conserved residue. Colon “:” indicates conservation between groups of strongly similar properties - scoring > 0.5 in the Gonnet PAM 250 matrix. Period “.” indicates conservation between groups of weakly similar properties - scoring =< 0.5 in the Gonnet PAM 250 matrix. Color coding reflects physicochemical properties: **Red** – small (small + hydrophobic (inc. aromatic –Y)); **Blue** – acidic; **Magenta** – Basic –H; **Green** – Hydroxyl + sulfhydryl + amine + G.

**Supplementary Figure S5. Western blot analysis of VP and Rep expression from wtAAV2, hcoAAV2 and lcoAAV2.** Levels of capsid proteins (VP1, VP2 and VP3) as well as replicase (Rep78, Rep68, Rep52, and Rep40) in 293T packaging cells transfected with AAV-LSP-GFP, pAd5 and: pAAV2 packaging plasmid encoding wild-type AAV2 Rep and Cap (first lane: **wtAAV2**), plasmid encoding wild-type Rep2 and cap2 optimized using conventional codon-optimization method (second lane: **hcoAAV2**), and plasmid encoding wild-type Rep2 and cap2 optimized using localized codon-optimization method (lane three: **lcoAAV2**), without providing AAP2 *in trans*, or with AAP2 expressed *in trans* (lane five, six, seven: **+AAP2**). 293T transfected with pAd5 and AAV-LSP-GFP only served as negative control (lane eight: **Negative control**)

**Supplementary Figure S6. Sequences of lcoAAVs used in the study.**

# Supplementary Figure S1

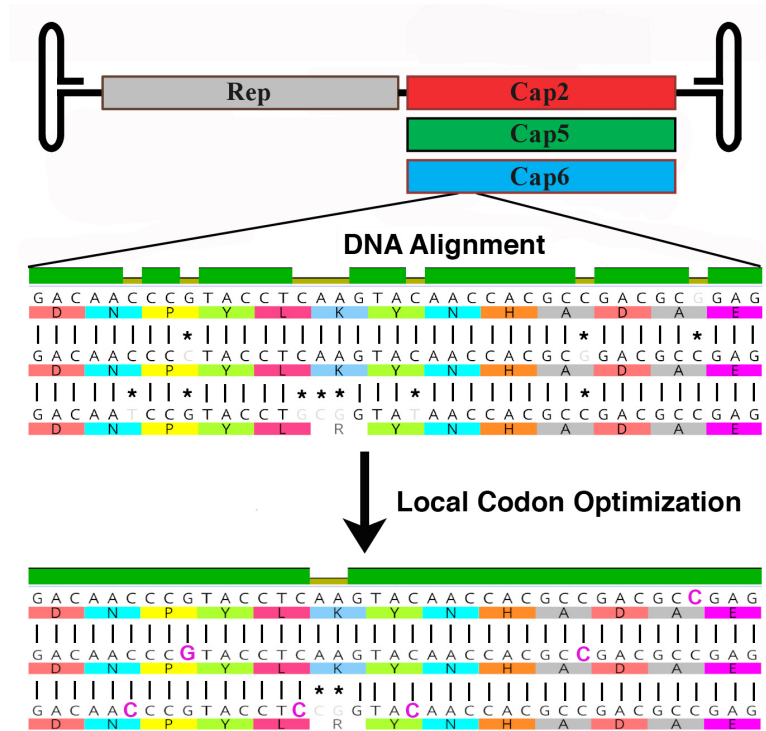

Supplementary Figure S2

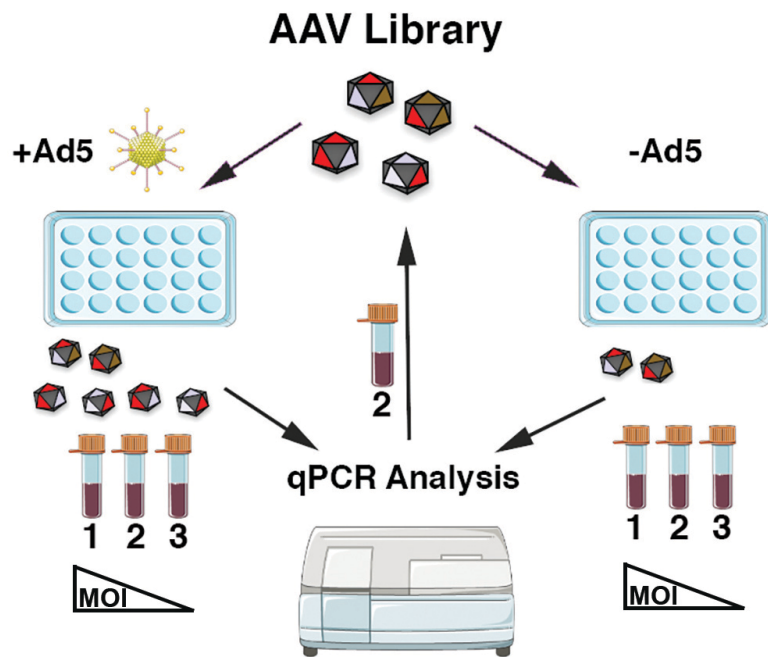

### Supplementary Figure S3

hcoAAV2:

ATGGCCGCCGACGGCTACCTGCCAGACTGGCTGGAGGACACCCTGAGCGAGGGCATCA  
GACAGTGGTGGAAGCTGAAGCCCCGGCCCCCCCCCAAGCCCGCCGAGAGACACAA  
GGACGACAGCAGAGGCCTGGTGCTGCCCGGCTACAAGTACCTGGGCCCTTCAACGGC  
CTGGACAAGGGCGAGCCCGTGAACGAGGCCGACGCCGCCGCCCTGGAGCACGACAAG  
GCCTACGACAGACAGCTGGACAGCGGCGACAACCCCTACCTGAAGTACAACCACGCCG  
ACGCCGAGTTCCAGGAGAGACTGAAGGAGGACACCAGCTTCGGCGGCAACCTGGGCA  
GAGCCGTGTTCCAGGCCAAGAAGAGAGTGCTGGAGCCCCTGGGCCTGGTGGAGGAGCC  
CGTGAAGACGGCCCCCGGCAAGAAGAGACCCCGTGGAGCACAGCCCCGTGGAGCCCGA  
CAGCAGCAGCGGCACCGGCAAGGCCGGCCAGCAGCCCCGCCAGAAAGAGACTGAACTT  
CGGCCAGACTGGCGACGCCGACAGCGTGCCCGACCCCCAGCCCCTGGGCCAGCCCCC  
GCCGCCCCAGCGGCCCTGGGCACCAACACCATGGCCACCGGCAGCGGCCGCCCCATGG  
CCGACAACAACGAGGGCGCCGACGGCGTGGGCAACAGCAGCGGCAACTGGCACTGCG  
ACAGCACCTGGATGGGCGACAGAGTGATCACCACCAGCACCAGAACCTGGGCCCTGCC  
CACCTACAACAACCACCTGTACAAGCAGATCAGCAGCCAGAGCGGCGCCAGCAACGA  
CAACCACTACTTCGGCTACAGCACCCCTGGGGCTACTTCGACTTCAACAGATTCCACT  
GCCACTTCAGCCCCAGAGACTGGCAGAGACTGATCAACAACAACCTGGGGCTTCAGACC  
CAAGAGACTGAACTTCAAGCTGTTCAACATCCAGGTGAAGGAGGTGACCCAGAACGAC  
GGCACCACCACCATCGCCAACAACCTGACCAGCACCGTGCAGGTGTTACCCGACAGCG  
AGTACCAGCTGCCCTACGTGCTGGGCAGCGCCCACCAGGGCTGCCTGCCCCCTTCCCC  
GCCGACGTGTTTCATGGTGCCCCAGTACGGCTACCTGACCCTGAACAACGGCAGCCAGG  
CCGTGGGCAGAAGCAGCTTCTACTGCCTGGAGTACTTCCCCAGCCAGATGCTGAGAAC  
CGGCAACAACCTTCACCTTCAGCTACACCTTCGAGGACGTGCCCTTCCACAGCAGCTACG  
CCCACAGCCAGAGCCTGGACAGACTGATGAACCCCTGATCGACCAGTACCTGTACTA  
CCTGAGCAGAACCAACACCCCCAGCGGCACCACCACCCAGAGCAGACTGCAGTTCAGC  
CAGGCCGGCGCCAGCGACATCAGAGACCAGAGCAGAAACTGGCTGCCCGGCCCTGCT  
ACAGACAGCAGAGAGTGAGCAAGACCAGCGCCGACAACAACAACAGCGAGTACAGCT  
GGACCGGCGCCACCAAGTACCACCTGAACGGCAGAGACAGCCTGGTGAACCCCGGCC  
CGCCATGGCCAGCCACAAGGACGACGAGGAGAAGTTCTTCCCCAGAGCGGCCGTGCTG  
ATCTTCGGCAAGCAGGGCAGCGAGAAGACCAACGTGGACATCGAGAAGGTGATGATC  
ACCGACGAGGAGGAGATCAGAACCACCAACCCCGTGGCCACCGAGCAGTACGGCAGC  
GTGAGCACCAACCTGCAGAGAGGCAACAGACAGGCCGCCACCGCCGACGTGAACACC  
CAGGGCGTGCTGCCCGGCATGGTGTGGCAGGACAGAGACGTGTACCTGCAGGGCCCCA  
TCTGGGCCAAGATCCCCACACCGACGGCCACTTCCACCCCAGCCCCCTGATGGGCGG  
CTTCGGCCTGAAGCACCCCCCCCCCAGATCCTGATCAAGAACACCCCCGTGCCGCCA  
ACCCAGCACCACTTCAGCGCCGCCAAGTTCGCCAGCTTCATCACCCAGTACAGCACC  
GGCCAGGTGAGCGTGGAGATCGAGTGGGAGCTGCAGAAGGAGAACAGCAAGAGATGG  
AACCCCGAGATCCAGTACACCAGCAACTACAACAAGAGCGTGAACGTGGACTTCACCG  
TGGACACCAACGGCGTGTACAGCGAGCCCAGACCCATCGGCACCAGATACCTGACCAG  
AACCTGTGA

hcoAAV5:

ATGAGCTTCGTGGACCACCCCCCGATTGGCTGGAGGAGGTGGGCGAGGGCCTGAGAG  
AGTTCCTGGGCCTGGAGGCCGGCCCCCAAGCCCAAGCCCAACCAGCAGCACCAGGA

CCAGGCCAGAGGCCTGGTGCTGCCCCGGCTACAACCTACCTGGGCCCCGGCAACGGCCTG  
GACAGAGGCGAGCCCGTGAACAGAGCCGACGAGGTGGCCAGAGAGCACGACATCAGC  
TACAACGAGCAGCTGGAGGCCGGCGACAACCCCTACCTGAAGTACAACCACGCCGACG  
CCGAGTTCCAGGAGAAGCTGGCCGACGACACCAGCTTCGGCGGCAACCTGGGCAAGGC  
CGTGTTCAGGCCAAGAAGAGAGTGCTGGAGCCCTTCGGCCTGGTGGAGGAGGGCGCC  
AAGACGGCCCCACCGGCAAGAGAATCGACGACCACTTCCCCAAGAGAAAGAAGGCC  
AGAACCGAGGAGGACAGCAAGCCCAGCACCAGCAGCGACGCCGAGGCTGGCCCCAGC  
GGCAGCCAGCAGCTGCAGATCCCCGCCAGCCCGCCAGCAGCCTGGGCGCCGACACCA  
TGAGCGCCGGCGGCGGCGGCCCCCTGGGCGACAACAACCAGGGCGCCGACGGCGTGG  
GCAACGCCAGCGGCGACTGGCACTGCGACAGCACCTGGATGGGCGACAGAGTGGTGA  
CCAAGAGCACCAAGAACCTGGGTGCTGCCAGCTACAACAACCACCAGTACAGAGAGAT  
CAAGAGCGGCAGCGTGGACGGCAGCAACGCCAACGCCTACTTCGGCTACAGCACCCCC  
TGGGGCTACTTCGACTTCAACAGATTCCACAGCCACTGGAGCCCCAGAGACTGGCAGA  
GACTGATCAACAACCTACTGGGGCTTCAGACCCAGAAGCCTGAGAGTGAAGATCTTCAA  
CATCCAGGTGAAGGAGGTGACCGTGCAGGACAGCACCACCACCTCGCCAACAACCTG  
ACCAGCACCGTGCAGGTGTTACCGACGACGACTACCAGCTGCCCTACGTGGTGGGCA  
ACGGCACCGAGGGCTGCCTGCCCGCCTTCCCCCCCCAGGTGTTACCCTGCCCCAGTAC  
GGCTACGCCACCCTGAACAGAGACAACACCGAGAACCCACCGAGAGAAGCAGCTTCT  
TCTGCCTGGAGTACTTCCCCAGCAAGATGCTGAGAACCGGCAACAACCTTCGAGTTCAC  
CTACAACCTCGAGGAGGTGCCCTTCCACAGCAGCTTCGCCCCAGCCAGAACCTGTTCA  
AGCTGGCCAACCCCTGGTGGACCAGTACCTGTACAGATTCGTGAGCACCAACAACAC  
CGGCGGCGTGCAGTTCAACAAGAACCTGGCCGGCAGATACGCCAACACCTACAAGAAC  
TGTTCCCCGGCCCCATGGGCAGAACCCAGGGCTGGAACCTGGGCAGCGGCGTGAACA  
GAGCCAGCGTGAGCGCCTTCGCCACCACCAACAGAATGGAGCTGGAGGGCGCCAGCTA  
CCAGGTGCCCCCCCAGCCCAACGGCATGACCAACAACCTGCAGGGCAGCAACACCTAC  
GCCCTGGAGAACACCATGATCTTCAACAGCCAGCCCGCCAACCCCGGCACCACCGCCA  
CCTACCTGGAGGGCAACATGCTGATCACCAGCGAGAGCGAGACCCAGCCCGTGAACAG  
AGTGGCCTACAACGTGGGCGGCCAGATGGCCACCAACAACCAGAGCAGCACCCCGC  
CCCCGCCACCGGCACCTACAACCTGCAGGAGATCGTGCCCGGCAGCGTGTGGATGGAG  
AGAGACGTGTACCTGCAGGGCCCCATCTGGGCCAAGATCCCCGAGACCGGCGCCCACT  
TCCACCCAGCCCCGCCATGGGCGGCTTCGGCCTGAAGCACCCCCCCCCCATGATGCTG  
ATCAAGAACACCCCGTGCCCGGCAACATCACCAGCTTCAGCGACGTGCCCGTGAGCA  
GCTTCATCACCCAGTACAGCACCGGCCAGGTGACCGTGGAGATGGAGTGGGAGCTGAA  
GAAGGAGAACAGCAAGAGATGGAACCCCGAGATCCAGTACACCAACAACCTACAACGA  
CCCCAGTTTCGTGGACTTCGCCCCGACAGCACCGGCGAGTACAGAACCACCAGACCC  
ATCGGCACCAGATACCTGACCAGACCCCTGTGA

hcoAAV6:

ATGGCCCGCGACGGCTACCTGCCCCGATTGGCTGGAGGACAACCTGAGCGAGGGCATCA  
GAGAGTGGTGGGACCTGAAGCCCGGCGCCCCAAGCCAAGGCCAACCAGCAGAAGC  
AGGACGACGGCAGAGGCCTGGTGCTGCCCCGGCTACAAGTACCTGGGCCCCCTTCAACGG  
CCTGGACAAGGGCGAGCCCGTGAACGCCGCCGACGCCGCCGCCCTGGAGCACGACAA  
GGCCTACGACCAGCAGCTGAAGGCCGGCGACAACCCCTACCTGAGATAACAACCACGCC  
GACGCCGAGTTCCAGGAGAGACTGCAGGAGGACACCAGCTTCGGCGGCAACCTGGGC  
AGAGCCGTGTTCCAGGCCAAGAAGAGAGTGCTGGAGCCCTTCGGCCTGGTGGAGGAGG  
GCGCCAAGACGGCCCCCGCAAGAAGAGACCCGTGGAGCAGAGCCCCAGGAGCCCG  
ACAGCAGCAGCGGCATCGGCAAGACCGGCCAGCAGCCCGCCAAGAAGAGACTGAACT

TCGGCCAGACTGGCGACAGCGAGAGCGTGCCCGACCCCCAGCCCCTGGGCGAGCCCC  
CGCCACCCCCGCCGCCGTGGGCCCCACCACCATGGCCAGCGGGCGGGCGCCCCCATG  
GCCGACAACAACGAGGGGCGCCGACGGCGTGGGCAACGCCAGCGGCAACTGGCACTGC  
GACAGCACCTGGCTGGGCGACAGAGTGATCACCACCAGCACCAGAACCTGGGCCCTGC  
CCACCTACAACAACCACCTGTACAAGCAGATCAGCAGCGCCAGCACCGGCGCCAGCAA  
CGACAACCACTACTTCGGCTACAGCACCCCCTGGGGTACTTCGACTTCAACAGATTCC  
ACTGCCACTTCAGCCCCAGAGACTGGCAGAGACTGATCAACAACAACCTGGGGCTTCAG  
ACCCAAGAGACTGAACTTCAAGCTGTTCAACATCCAGGTGAAGGAGGTGACCACCAAC  
GACGGCGTGACCACCATCGCCAACAACCTGACCAGCACCGTGCAGGTGTTTCAGCGACA  
GCGAGTACCAGCTGCCCTACGTGCTGGGCAGCGCCCACCAGGGTGCCTGCCCCCTTC  
CCCGCCGACGTGTTTCATGATCCCCAGTACGGCTACCTGACCCTGAACAACGGCAGCC  
AGGCCGTGGGCAGAAGCAGCTTCTACTGCCTGGAGTACTTCCCAGCCAGATGCTGAG  
AACCGGCAACAACCTTCACCTTCAGCTACACCTTCGAGGACGTGCCCTTCCACAGCAGCT  
ACGCCCACAGCCAGAGCCTGGACAGACTGATGAACCCCCTGATCGACCAGTACCTGTA  
CTACCTGAACAGAACCAGAACAGAGCGGCAGCGCCAGAACAAAGGACCTGCTGTTC  
AGCAGAGGCAGCCCCGCCGGCATGAGCGTGCAGCCCAAGAACTGGCTGCCCGGCCCT  
GCTACAGACAGCAGAGAGTGAGCAAGACCAAGACCGACAACAACAACAGCAACTTCA  
CCTGGACC GGCGCCAGCAAGTACAACCTGAACGGCAGAGAGAGCATCATCAACCCCG  
GCACCGCCATGGCCAGCCACAAGGACGACAAGGACAAGTTCTTCCCCATGAGCGGCGT  
GATGATCTTCGGCAAGGAGAGCGCCGGCGCCAGCAACACCGCCCTGGACAACGTGATG  
ATCACCGACGAGGAGGAGATCAAGGCCACCAACCCCGTGGCCACCGAGAGATTCGGC  
ACCGTGGCCGTGAACCTGCAGAGCAGCAGCACCGACCCCGCCACCGGCGACGTGCACG  
TGATGGGCGCCCTGCCCGGCATGGTGTGGCAGGACAGAGACGTGTACCTGCAGGGCCC  
CATCTGGGCCAAGATCCCCCACACCGACGGCCACTTCCACCCAGCCCCCTGATGGGC  
GGCTTCGGCCTGAAGCACCCCCCCCCCAGATCCTGATCAAGAACACCCCCGTGCCCG  
CCAACCCCCCGCCGAGTTCAGCGCCACCAAGTTCGCCAGCTTCATCACCCAGTACAGC  
ACCGGCCAGGTGAGCGTGGAGATCGAGTGGGAGCTGCAGAAGGAGAACAGCAAGAGA  
TGGAAACCCCGAGGTGCAGTACACCAGCAACTACGCCAAGAGCGCCAACGTGGACTTCA  
CCGTGGACAACAACGGCCTGTACACCGAGCCCAGACCCATCGGCACCAGATACCTGAC  
CAGACCCCTGTGA

hcoAAV8:

ATGGCCGCGACGGCTACCTGCCAGACTGGCTGGAGGACAACCTGAGCGAGGGCATCA  
GAGAGTGGTGGGCCCTGAAGCCCGGCCCCCCAAGCCCAAGGCCAACCAGCAGAAGC  
AGGACGACGGCAGAGGCCTGGTGTGCCCGGCTACAAGTACCTGGGCCCCCTTCAACGG  
CCTGGACAAGGGCGAGCCCGTGAACGCCGCCGACGCCGCCGCTGGAGCACGACAA  
GGCCTACGACCAGCAGCTGCAGGCGGGCACAACCCCTACCTGAGATAACAACCACGCC  
GACGCCGAGTTCAGGAGAGACTGCAGGAGGACACCAGCTTCGGCGGCAACCTGGGC  
AGAGCCGTGTTCCAGGCCAAGAAGAGAGTGCTGGAGCCCCTGGGCCTGGTGGAGGAG  
GGCGCCAAGACGGCCCCCGGCAAGAAGAGACCCGTGGAGCCAGCCCCAGAGAAGC  
CCCGACAGCAGCACCGGCATCGGCAAGAAGGGCCAGCAGCCCGCCAGAAAGAGACTG  
AACTTCGGCCAGACTGGCGACAGCGAGAGCGTGCCCGACCCCCAGCCCCTGGGCGAGC  
CCCCCGCCGCCCCAGCGGCGTGGGCCCAACACCATGGCCGCCGGCGGGCGGCCGCC  
CATGGCCGACAACAACGAGGGGCGCCGACGGCGTGGGCAGCAGCAGCGGCAACTGGCA  
CTGCGACAGCACCTGGCTGGGCGACAGAGTGATCACCACCAGCACCAGAACCTGGGCC  
CTGCCACCTACAACAACCACCTGTACAAGCAGATCAGCAACGGCACCCAGCGGGCGCG  
CCACCAACGACAACACCTACTTCGGCTACAGCACCCCCTGGGGTACTTCGACTTCAAC



AGATTCCACTGCCACTTCAGCCCCAGAGACTGGCAGAGACTGATCAACAACAACCTGGG  
GCTTCAGACCCAAGAGACTGAGCTTCAAGCTGTTCAACATCCAGGTGAAGGAGGTGAC  
CCAGAACGAGGGCACCAAGACCATCGCCAACAACCTGACCAGCACCATCCAGGTGTTT  
ACCGACAGCGAGTACCAGCTGCCCTACGTGCTGGGCAGCGCCCACCAGGGCTGCCTGC  
CCCCCTTCCCCGCCGACGTGTTTCATGATCCCCCAGTACGGCTACCTGACCCTGAACAAC  
GGCAGCCAGGCCGTGGGCAGAAGCAGCTTCTACTGCCTGGAGTACTTCCCCAGCCAGA  
TGCTGAGAACCGGCAACAACCTTCCAGTTCACCTACACCTTCGAGGACGTGCCCTTCCAC  
AGCAGCTACGCCACAGCCAGAGCCTGGACAGACTGATGAACCCCCTGATCGACCAGT  
ACCTGTACTACCTGAGCAGAACCCAGACCACCGGCCGGCACCGCCAACACCCAGACCCT  
GGGCTTCAGCCAGGGCGGCCCAACACCATGGCCAACAGGCCAAGAAGTGGCTGCC  
GGCCCCTGCTACAGACAGCAGAGAGTGAAGCACCACCACCGGCCAGAACAACAACAGC  
AACTTCGCCTGGACCGGCCGACCAAGTACCACCTGAACGGCAGAAACAGCCTGGCCA  
ACCCCGGCATCGCCATGGCCACCCACAAGGACGACGAGGAGAGATTCTTCCCCAGCAA  
CGGCATCCTGATCTTCGGCAAGCAGAACGCCGCCAGAGACAACGCCGACTACAGCGAC  
GTGATGCTGACCAGCGAGGAGGAGATCAAGACCACCAACCCCGTGGCCACCGAGGAG  
TACGGCATCGTGGCCGACAACCTGCAGCAGCAGAACACCGCCCCCAGATCGGCACCG  
TGAACAGCCAGGGCGCCCTGCCCCGGCATGGTGTGGCAGAACAGAGACGTGTACCTGCA  
GGGCCCCATCTGGGCCAAGATCCCCCACACCGACGGCAACTTCCACCCCAGCCCCCTG  
ATGGGCGGCTTCGGCCTGAAGCACCCCCCCCCCAGATCCTGATCAAGAACACCCCCG  
TGCCCGCCGACCCCCCACCACCTTCAACCAGAGCAAGCTGAACAGCTTCATCACCCA  
GTACAGCACCGGCCAGGTGAGCGTGGAGATCGAGTGGGAGCTGCAGAAGGAGAACAG  
CAAGAGATGGAACCCCGAGATCCAGTACACCAGCAACTACTACAAGAGCACCCAGCGT  
GGACTTCGCCGTGAACACCGAGGGCGTGTACAGCGAGCCAGACCCATCGGCACCAGA  
TACCTGACCAGAAACCTGTGA

# Supplementary Figure S4

**wt\_AAP1** MATQSQSPIHNLSENLQQPPLWDLLOWLQAVAHQWQTITKAPTEWVMPQEIGIAIPHW  
**lco\_AAP1** MATQSQSPTLNLSENLQQPPLWDLLOWLQAVAHQWQTITKAPTEWVMPREIGIAIPHW  
\*\*\*\*\* ;\*\*\*\*\*  
  
ATESSPPAPAPGPCPPTITTTSTKSPVLQRPATTTTTSATAPPGILISTDSTATFHHV  
ATESSPPAPEPGPCPPTTTTSTKSPVLQREPATTTTTSATAPPGILTSTDSTATSHHV  
\*\*\*\*\* \*\*\*\*\* \*\*\*\*\* \*\*\*\*\* \*\*\*\*\* \*\*  
  
TGSDSSTTIGDSGPRDSTSNSSSTKSRRRMMASQPSLITLPAFRKSSRTRSTSFRTSS  
TGSDSSTTTGDSGPRDSTSSSSTKSRRRMMASRPSPITLPAFRKCFRTRSTSSRTSS  
\*\*\*\*\* \*\*\*\*\* ;\*\* \*\*\*\*\* ;\*\*\*\*\* \*\*  
  
ALRTRAASLRSRRTCS  
ALRTRAASLRSRRTSS  
\*\*\*\*\* ;\*

**wt\_AAP2** METQTQYLTPSLSDSHQQPPLVWELIRWLQAVAHQWQTITRAPTEWVIPREIGIAIPHW  
**lco\_AAP2** MATQTQSPTLNLSDSLQQPPLVWELIQWLQAVAHQWQTITKAPTEWVIPREIGIAIPHW  
\* \*\*\*\* \* ;\*\*\*\*\* ;\*\*\*\*\* ;\*\*\*\*\*  
  
ATESSPPAPEPGPCPPTTTTSTNKFPANQEPRTTITTLATAPLGGILTSTDSTATFHHVT  
ATESSPPAPEPGPCPPTTTTSTKSVANQEPATTTTTSATAPPGILTSTDSTATSHHVT  
\*\*\*\*\* ;\* \*\*\*\*\* \*\* \*\* \*\*\*\*\* \*\*\*\*\* \*\*  
  
GKDSSTTTGDSGPRDSTSSSLTFKSKRRMTVRRRLPITLPAFRCLLTRSTSSRTSSA  
GSDSSTTTGDSGPRDSTSSSSTKSRRRMMARRPSPIITLPAFRKCLRTRSTSSRTSSA  
\* ;\*\*\*\*\* ;\*\*\*\*\* \* \*\* ;\*\*\*\*\* ;\*\* \*\*\*\*\* ;\*\* \*\*\*\*\*  
  
RRIKDasRRSQQTSSWCHSMDTSP  
LRTRAASLRSRRTSSWCRSTAT--  
\* ; \*\* \*\* ;\*\*\*\*\* ;\* \*

Supplementary Figure S5

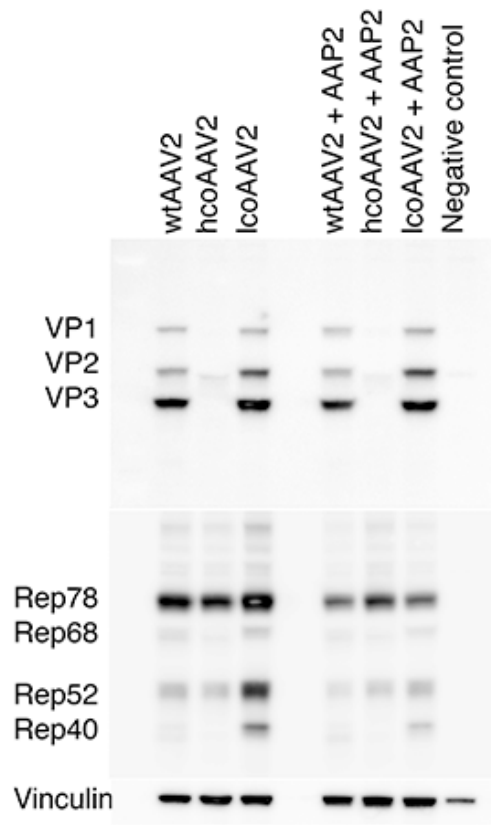

## Supplementary Figure S6

### lcoAAV1

ATGGCTGCCGATGGTTATCTTCCAGATTGGCTCGAGGACAACCTCTCTGAAGGCATTTCG  
CGAGTGGTGGGACTTGAAACCTGGAGCCCCGAAACCCAAAGCCAACCAGCAAAAAGCA  
GGACGACGGCCGGGTCTTGTGCTTCTGGTTACAAGTACCTCGGACCCTTCAACGGAC  
TCGACAAGGGGGAGCCCGTCAACGCGGCGGACGCAGCGGCCCTCGAGCACGACAAGG  
CCTACGACCAGCAGCTCAAGGCGGGTGACAACCCGTACCTCCGGTACAACCACGCCGA  
CGCCGAGTTTCAGGAGCGTCTGCAAGAAGATACGTCTTTTGGGGGCAACCTCGGGCGA  
GCAGTCTTCCAGGCCAAGAAGAGGGTTCTCGAACCTCTTGGTCTGGTTGAGGAAGGCG  
CTAAGACGGTCTCTGGAAAGAAGCGTCCGGTAGAGCAGTCTCCACAGGAGCCAGACTC  
CTCCTCGGGCATCGGCAAGACAGGCCAGCAGCCCGCTAAAAAGAGACTCAATTTTGGT  
CAGACTGGCGACTCAGAGTCAGTCCCCGACCCTCAACCTCTCGGAGAACCTCCAGCAA  
CCCCCGCTGCTGTGGGACCTACTACAATGGCTTCAGGCGGTGGCGCACCAATGGCAGA  
CAATAACGAAGGCGCCGACGGAGTGGGTAATGCCTCGGGAAATTGGCATTGCGATTCC  
ACATGGCTGGGCGACAGAGTCATCACCACCAGCACCCGAACCTGGGCCCTGCCACCT  
ACAACAACCACCTCTACAAGCAAATCTCCAGTGCTTCAACGGGAGCCAGCAACGACAA  
CCACTACTTCGGCTACAGCACCCCTGGGGGTATTTTGACTTCAACAGATTCCACTGCC  
ACTTCTCACCACGTGACTGGCAGCGACTCATCAACAACAACCTGGGGATTCCGGCCCAA  
GAGACTCAACTTCAAGCTCTTCAACATCCAAGTCAAGGAGGTCACGACGAATGATGGC  
GTCACGACCATCGCCAATAACCTTACCAGCACGGTTCAGGTGTTTTTCGGACTCGGAGTA  
CCAGCTCCCGTACGTCTCGGCTCTGCGCACCCAGGGCTGCCTCCCTCCGTTCCCGGGCGG  
ACGTCTTCATGATTCCGCAGTACGGCTACCTGACGCTCAACAACGGCAGCCAGGCCGT  
GGGACGCTCATCCTTTTACTGCCTGGAATACTTCCCTTCGCAGATGCTGAGAACGGGCA  
ACAACCTTACCTTCAGCTACACCTTTGAGGAAGTGCCTTTCCACAGCAGCTACGCTCAC  
AGCCAGAGCCTGGACCGGCTGATGAATCCTCTCATCGACCAGTACCTGTACTACCTGA  
ACAGAACTCAAAATCAGTCCGGAAGTGCCAAAACAAGGACTTGCTGTTTAGCCGTGG  
GTCTCCTGCTGGCATGTCTGTTCAGCCAAAACCTGGCTACCTGGACCCTGTTACCGGC  
AGCAGCGCTTTCAAAGACAAAACAGACAACAACAACAGCAACTTTACCTGGACTGG  
TGCTTCAAAATATAACCTCAATGGCCGTGAATCTATCATCAATCCTGGCACTGCTATGG  
CCTCACACAAAGACGACGAAGACAAGTTCTTTCCCATGAGCGGTGTCATGATTTTTGGC  
AAAGAGAGCGCCGGAGCTTCAAACACTGCATTGGACAATGTCATGATTACCGACGAAG  
AGGAAATTAAGCCACTAACCTGTGGCCACGGAGAGATTTGGGACTGTGGCAGTCAA  
CTTCCAGAGCAGCAGCACAGACCCTGCGACCGGAGATGTCCATGCTATGGGAGCCTTA  
CCTGGCATGGTGTGGCAAGACAGAGACGTGTACCTGCAGGGTCCCATTTGGGCCAAGA  
TTCCTCACACGGATGGACACTTTCACCCGTCTCCGCTGATGGGCGGCTTTGGACTGAAA  
AACCCGCCTCCTCAGATCCTCATCAAAAACACGCCTGTACCTGCGAATCCTCCGGCGGA  
GTTACAGCGCTACAAAGTTTGCTTCATTCATCACCCAGTACTCCACTGGACAGGTCAGCG  
TGGAGATTGAGTGGGAGCTGCAGAAGGAAAACAGCAAGCGCTGGAATCCCGAGGTGC  
AGTACACATCCAACCTACGCAAAATCTGCCAATGTGGACTTTACTGTGGACAACAATGG  
ACTTTATACTGAGCCTCGCCCCATTGGCACCCGTTACCTCACCCGTCCCCTGTAA

### lcoAAV2

ATGGCTGCCGATGGTTATCTTCCAGATTGGCTCGAGGACACTCTCTCTGAAGGCATTTCG  
CCAGTGGTGGAAAGTTGAAACCTGGACCACCGCCACCCAAACCCGCGAGAGCGGCATAAG  
GACGACAGCCGGGGTCTTGTGCTTCTGGTTACAAGTACCTCGGACCCTTCAACGGACT

CGACAAGGGGGAGCCCGTCAACGAGGCGGACGCAGCGGCCCTCGAGCACGACAAGGC  
CTACGACCGGCAGCTCGACAGCGGTGACAACCCGTACCTCAAGTACAACCACGCCGAC  
GCCGAGTTTCAGGAGCGTCTGAAAGAAGATACGTCTTTTGGGGGCAACCTCGGGCGAG  
CAGTCTTCCAGGCCAAGAAGAGGGTTCTCGAACCTCTTGGTCTGGTTGAGGAACCTGTT  
AAGACGGCTCCTGGAAAGAAGCGTCCGGTAGAGCACTCTCCAGTGGAGCCAGACTCCT  
CCTCGGGCACCGGCAAGGCGGGCCAGCAGCCCGCTAGAAAGAGACTCAATTTTGGTCA  
GACTGGCGACGCAGACTCAGTCCCCGACCCTCAACCTCTCGGACAGCCTCCAGCAGCC  
CCCTCTGGTTTGGGAACTAATAACAATGGCTACAGGCAGTGGCGCACCAATGGCAGACA  
ATAACGAAGGCGCCGACGGAGTGGGTAATTCCTCGGGAAATTGGCATTGCGATTCCAC  
ATGGATGGGCGACAGAGTCATCACCACCAGCACCCGAACCTGGGCCCTGCCACCTAC  
AACAAACCCTCTACAAGCAAATCAGTAGCCAATCAGGAGCCAGCAACGACAACCACT  
ACTTCGGCTACAGCACCCCTGGGGGTATTTTGACTTCAACAGATTCCACTGCCACTTC  
TCACCACGTGACTGGCAGCGACTCATCAACAACAACCTGGGGATTCCGGCCCAAGAGAC  
TCAACTTCAAGCTCTTCAACATCCAAGTCAAGGAGGTCACGCAGAATGATGGCACGAC  
GACCATCGCCAATAACCTTACCAGCACGGTTCAAGTGTTTACGGACTCGGAGTACCAG  
CTCCCGTACGTCTCGGCTCTGCGCACCCAGGGCTGCCTCCCTCCGTTCCCGGCGGACGT  
CTTCATGGTGCCGACGACGCTACCTGACGCTGAACAACGGCAGCCAGGCCGTGGGA  
CGCTCATCCTTTTACTGCCTGGAATACTTCCCTTCGCAGATGCTGAGAACGGGCAACAA  
CTTACCTTCAGCTACACCTTTGAGGACGTGCCTTTCCACAGCAGCTACGCTCACAGCC  
AGAGCCTGGACCGGCTGATGAATCCTCTCATCGACCAGTACCTGTACTACCTGAGCAG  
AACTAACACTCCATCCGGAACCACCGCAATCAAGGTTGCAGTTTAGCCAGGCCGGA  
GCGAGTGACATTCGGGACCAGTCTAGAAACTGGCTACCTGGACCCTGTTACCGGCAGC  
AGCGCGTTTCAAAGACATCTGCGGACAACAACAACAGCGAATACTCGTGGACTGGTGC  
TACCAAATATCATCTCAATGGCCGTGACTCTCTGGTGAATCCTGGCCCGGCTATGGCCT  
CACACAAAGACGACGAAGAAAAGTTCTTTCCCCAGAGCGGTGTCTCATTTTTTGGCAA  
ACAAGGCTCAGAGAAAACAACGTTGGATATTGAAAAGGTCATGATTACCGACGAAGA  
GGAAATTAGGACCACTAACCCGTGGCCACGGAGCAGTATGGGTCTGTGTCTACCAAC  
CTCCAGAGAGGCAACAGACAAGCAGCGACCCGACAGATGTCAACACACAGGGAGTTT  
CCTGGCATGGTGTGGCAAGACAGAGACGTGTACCTGCAGGGTCCCATTGTTGGGCCAAGA  
TTCCTCACACGGATGGACACTTTCACCCGTCTCCGCTGATGGGCGGCTTTGGACTGAAA  
CACCCGCCTCCTCAGATCCTCATCAAAAACACGCCTGTACCTGCGAATCCTTCGACCAC  
CTTCAGCGCTGCAAAGTTTGCTTCATTCATCACCCAGTACTCCACTGGACAGGTCAGCG  
TGGAGATTGAGTGGGAGCTGCAGAAGGAAAACAGCAAGCGCTGGAATCCCGAGATCC  
AGTACACATCCAACACTACAACAATCTGTTAATGTGGACTTTACTGTGGACACTAATGGA  
GTGTATAGTGAGCCTCGCCCCATTGGCACCCGTTACCTCACCCGTAATCTGTAA

lcoAAV3B

ATGGCTGCCGATGGTTATCTTCCAGATTGGCTCGAGGACAACCTCTCTGAAGGCATTTCG  
CGAGTGGTGGGCTTTGAAACCTGGAGTCCCGCAACCCAAAGCCAACCAGCAACATCAG  
GACAACCGTCGGGGTCTTGTGCTTCTGGTTACAAGTACCTCGGACCCGGCAACGGACT  
CGACAAGGGGGAGCCCGTCAACGAGGCGGACGCAGCGGCCCTCGAGCACGACAAGGC  
CTACGACCAGCAGCTCAAGGCGGGTGAACAACCCGTACCTCAAGTACAACCACGCCGAC  
GCCGAGTTTCAGGAGCGTCTGCAAGAAGATACGTCTTTTGGGGGCAACCTCGGGCGAG  
CAGTCTTCCAGGCCAAGAAGAGGATCCTCGAACCTCTTGGTCTGGTTGAGGAAGCGGC  
TAAGACGGCTCCTGGAAAGAAGCGTCCGGTAGATCAGTCTCCACAGGAGCCAGACTCC  
TCCTCGGGCGTTGGCAAGTCCGGGCAAACAGCCCGCTAGAAAGAGACTCAATTTTGGTC  
AGACTGGCGACTCAGAGTCAGTCCCCGACCCTCAACCTCTCGGAGAACCTCCAGCAGC  
CCCCACAAGTTTGGGATCTAATAACAATGGCTTCAGGCGGTGGCGCACCAATGGCAGAC

AATAACGAAGGCGCCGACGGAGTGGGTAATTCCTCGGGAAATTGGCATTGCGATTCCC  
AATGGCTGGGCGACAGAGTCATCACCACCAGCACCCGAACCTGGGCCCTGCCACCTA  
CAACAACCACCTCTACAAGCAAATCAGTAGCCAATCAGGAGCCAGCAACGACAACCAC  
TACTTCGGCTACAGCACCCCCTGGGGGTATTTTGACTTCAACAGATTCCACTGCCACTT  
CTCACCACGTGACTGGCAGCGACTCATCAACAACAACCTGGGGATTCCGGCCCAAGAAA  
CTCAGCTTCAAGCTCTTCAACATCCAAGTCAAGGAGGTCACGCAGAATGATGGCACGA  
CGACCATCGCCAATAACCTTACCAGCACGGTTCAAGTGTTTACGGACTCGGAGTACCA  
GCTCCCGTACGTCTCGGCTCTGCGCACCAGGGCTGCCTCCCTCCGTTCCCGGGCGGACG  
TCTTCATGGTGCCGCAGTACGGCTACCTGACGCTGAACAACGGCAGCCAGGCCGTGGG  
ACGCTCATCCTTTTACTGCCTGGAATACTTCCCTTCGCAGATGCTGAGAACGGGCAACA  
ACTTTCAGTTCAGCTACACCTTTGAGGACGTGCCTTTCCACAGCAGCTACGCTCACAGC  
CAGAGCCTGGACCGGCTGATGAATCCTCTCATCGACCAGTACCTGTACTACCTGAACA  
GAACTCAAGGAACTACCTCCGGAACCACCAACCAATCAAGGTTGCTGTTTAGCCAGGC  
CGGACCTCAGTCTATGTCTTTGCAGGCCAGAACTGGCTACCTGGACCCTGTTACCGGC  
AGCAGCGCCTTTCAAAGACAGCTAACGACAACAACAACAGCAACTTTCCTTGGACTGC  
GGCTTCAAATATCATCTCAATGGCCGTGACTCTCTGGTGAATCCTGGCCCGGCTATGG  
CCTCACACAAAGACGACGAAGAAAAGTTCTTTCCCATGCACGGTAATCTCATTTTTTGGC  
AAAGAGGGGCACAACGGCTTCAAACGCAGAATTGGACAATGTCATGATTACCGACGAA  
GAGGAAATTAGGACCACTAACCTGTGGCCACGGAGCAGTATGGGACTGTGGCAAATA  
ACCTCCAGAGCAGCAACACAGCTCCTACGACCAGAACTGTCAACGATCAGGGAGCCTT  
ACCTGGCATGGTGTGGCAAGACAGAGACGTGTACCTGCAGGGTCCCATTTGGGCCAAG  
ATTCTCACACGGATGGACACTTTCACCCGTCTCCGCTGATGGGCGGCTTTGGACTGAA  
ACACCCGCCTCCTCAGATCATGATCAAAAACACGCCTGTACCTGCGAATCCTCCGACCA  
CCTTCAGCCCGGCAAAGTTTGCTTCATTCATCACCAGTACTCCACTGGACAGGTCAGC  
GTGGAGATTGAGTGGGAGCTGCAGAAGGAAAACAGCAAGCGCTGGAATCCCGAGATC  
CAGTACACATCCAACCTACAACAATCTGTTAATGTGGACTTTACTGTGGACACTAATGG  
AGTGTATAGTGAGCCTCGCCCCATTGGCACCCGTTACCTCACCCGTAATCTGTAA

lcoAAV4

ATGACTGATGGTTATCTTCCAGATTGGCTCGAGGACAACCTCTCTGAAGGCGTTCGCGA  
GTGGTGGGCTTTGCAACCTGGAGCCCCGAAACCCAAAGCCAACCAGCAACATCAGGAC  
AACGCTCGGGGTCTTGTGCTTCTGGTTACAAGTACCTCGGACCCGGCAACGGACTCGA  
CAAGGGGGAGCCCGTCAACGCGGGCGGACGCAGCGGCCCTCGAGCACGACAAGGCCTA  
CGACCAGCAGCTCAAGGCGGGTGACAACCCGTACCTCAAGTACAACCACGCCGACGCC  
GAGTTTCAGCAGCGTCTGCAAGGCGATACGTCTTTTGGGGGCAACCTCGGGCGAGCAG  
TCTTCCAGGCCAAGAAGAGGGTTCTCGAACCTCTTGGTCTGGTTGAGCAAGCGGGTGA  
GACGGCTCCTGGAAGAAGCGTCCGTTGATTGAATCTCCACAGCAGCCAGACTCCTCC  
ACGGGCATCGGCAAGAAAGGCAAACAGCCCGCTAAAAAGAAGCTCGTTTTTGAAGAC  
GAAACTGGAGCAGGCGACGGACCCCCTGAGGGATCAACTTCCGGAGCCATGAGTGATG  
ACTCTGAGATGCGTGCTGCAGCTGGTGGCGCAGCAGTCGAGGGCGGACAAGGCGCCGA  
CGGAGTGGGTAATGCCTCGGGAGATTGGCATTGCGATTCCACATGGTCTGAGGGCCAC  
GTCACGACCACCAGCACCCGAACCTGGGTCCCTGCCACCTACAACAACCACCTCTACA  
AGCGACTCGGAGAGAGCCTGCAGTCCAACACCTACAACGGCTTCAGCACCCCCTGGGG  
GTATTTTGACTTCAACAGATTCCACTGCCACTTCTCACCACGTGACTGGCAGCGACTCA  
TCAACAACAACCTGGGGAAATGCGGCCCAAGGCCATGCGGGTCAAGATCTTCAACATCCA  
AGTCAAGGAGGTCACGACGTGCAACGGCGAGACGACCGTGGCCAATAACCTTACCAGC  
ACGGTTCAAATCTTTGCGGACTCGTCGTACGAACTCCCGTACGTCATGGATGCGGGTCA  
AGAGGGCAGCCTCCCTCCGTTCCCGAACGACGTCTTCATGGTGCCGCAGTACGGCTACT

GTGGACTGGTGACGGGCAACACTTCGCAGCAGCAGACTGACCGCAATGCCTTTTACTG  
CCTGGAATACTTCCCTTCGCAGATGCTGAGAACGGGCAACAACCTTTGAAATTACGTAC  
AGTTTTGAGAAGGTGCCTTTCCACAGCATGTACGCTCACAGCCAGAGCCTGGACCGGC  
TGATGAATCCTCTCATCGACCAGTACCTGTGGGGACTGCAATCGACTACCACTGGAACC  
ACCCTGAATGCCGGGACTGCCACCACCAACTTTACCAAGCTGCGGCCTACCAACTTTTC  
TAACTTTAAAAAAACTGGCTACCTGGACCCTCAATCAAGCAGCAGGGCTTCTCAAAG  
ACAGCTAACCAAAACTACAAGATCCCTGCCACCGGGAGCGACAGTCTCATCAAATACG  
AGACCCACAGCACTCTCGACGGCCGTTGGTCTGCCCTGACCCCTGGCCCCGCAATGGCC  
ACGGCTGGACCTGCGGACAGCAAGTTCAGCAACAGCCAGCTCATTTTTGCGGGCCCTA  
AACAGAACGGAAACACAGCCACTGTACCCGGGACTCTGATCTTCACCAGCGAAGAGGA  
ACTGGCAGCCACTAACGCCACCGATACGGACATGTGGGGGAACCTACCTGGCGGTGAC  
CAGAGCAACAGCAACCTGCCTACGGTGGACAGACTGACAGCTTTGGGAGCCGTGCCTG  
GCATGGTGTGGCAAACAGAGACATTTACTACCAGGGTCCCATTTGGGCCAAGATTCC  
TCACACGGATGGACACTTTCACCCGTCTCCGCTGATTGGCGGCTTTGGACTGAAACACC  
CGCTCCTCAGATCTTTATCAAAAACACGCCTGTACCTGCGAATCCTGCAACCACCTTC  
AGCTCTACACCGGTAAACTCATTCATCACCCAGTACTCCACTGGACAGGTGACGCTGCA  
GATTGACTGGGAGATCCAGAAGGAACGGAGCAAGCGCTGGAATCCCGAGGTGCAGTTT  
ACATCCAACACTACGGACAGCAAACTCTCTGTTGTGGGCTCCCGACGCGGCTGGAAAAT  
ATACTGAGCCTCGCGCTATTGGCACCCGTTACCTCACCCACCACCTGTAA

lcoAAV5

ATGTCTTTTGTGATCACCTCCAGATTGGCTCGAGGAAGTTGGTGAAGGCCTTCGCGA  
GTTTTTGGGCTTGGAAGCGGGACCACCGAAACCCAAACCCAACCAGCAACATCAGGAC  
CAAGCTCGGGGTCTTGTGCTTCCCTGGTTACAACACTACCTCGGACCCGGCAACGGACTCGA  
CCGAGGGGAGCCCGTCAACAGGGCGGACGAGGTGCGCCGAGAGCACGACATCTCGTA  
CAACGAGCAGCTCGAGGCGGGTGACAACCCGTACCTCAAGTACAACCACGCCGACGCC  
GAGTTTCAGGAGAAGCTGGCCGACGATACGTCTTTTGGGGCAACCTCGGGAAGGCAG  
TCTTCCAGGCCAAGAAGAGGGTTCTCGAACCTTTTGGTCTGGTTGAGGAAGGCGCTAA  
GACGGCTCCTACCGGAAAGCGTATAGACGATCACTTTCAAAAAAGAAAGAAGGCTCGG  
ACCGAAGAGGACTCCAAGCCCTCCACCTCGTCAGACGCAGAGGCTGGACCCAGCGGAT  
CCCAGCAGCTGCAGATCCCAGCACAAACCCGCCTCTAGTTTGGGAGCTGATACAATGTCT  
GCAGGCGGTGGCGGCCCATTTGGGCGACAATAACCAAGGCGCCGACGGAGTGGGTAAT  
GCCTCGGGAGATTGGCATTGCGATTCCACATGGATGGGCGACAGAGTCGTCACCAAGA  
GCACCCGAACCTGGGTCTGCCCAGCTACAACAACCACCAGTACCGAGAGATCAAAAG  
TGGCTCAGTCGACGGAAGCAACGCCAACGCCTACTTCGGCTACAGCACCCCCTGGGGG  
TATTTTACTTCAACAGATTCCACAGCCACTGGTCAACCACGTGACTGGCAGCGACTCAT  
CAACAACACTACTGGGGATTCCGGCCCCGGTCCCTCCGGGTCAAGATCTTCAACATCCAA  
GTCAAGGAGGTCACGGTGCAGGATTCCACGACGACCATCGCCAATAACCTTACCAGCA  
CGGTTCAAGTGTTTACGGACGACGACTACCAGCTCCCGTACGTCGTCGGCAACGGTAC  
CGAGGGCTGCCTCCCTGCCTTCCCGCCGACAGGTCTTACGCTGCCGACGACGCTACG  
CGACGCTCAACCGCGACAACACAGAAAATCCCCTGAGCGCTCATCCTTTTTCTGCCTG  
GAATACTTCCCTTCGAAGATGCTGAGAACGGGCAACAACCTTTGAATTCACGTACAACCT  
TGAGGAAGTGCCTTTCCACAGCAGCTTCGCTCCCAGCCAGAACCTGTTCAAGCTGGCCA  
ATCCTCTCGTGGACCAGTACCTGTACCGCTTCGTGTGACTAACAATACTGGCGGAGTC  
CAGTTTAAACAAGAACCTGGCGGGGAGATACGCCAACACCTACAAAAACTGGTTCCCTG  
GACCCATGGGCGGACCCAGGGCTGGAACCTGGGCTCTGGGGTCAACCGCGCCAGCGT  
CAGTGCCTTCGCCACGACCAATAGGATGGAGCTCGAGGGCGCGAGTTACCAGGTGCC  
CCTCAGCCGAACGGCATGACGAACAACCTCCAGGGCAGCAACACCTATGCCCTGGAGA

ACACTATGATTTTTAACAGCCAGCCGGCGAACCCGGGCACAACCGCAACGTACCTCGA  
GGGAATATGCTCATTACCAGCGAAAGCGAAACGCAGCCGGTGAACCGCGTGGCCTAC  
AACGTCGGCGGGCAGATGGCAACCAACAACCAGAGCAGCACCACAGCTCCTGCGACC  
GGAACTTACAACCTCCAGGAAATCGTGCCTGGCAGCGTGTGGATGGAGAGAGACGTGT  
ACCTGCAGGGTCCCATTTGGGCCAAGATTCTGAGACGGGGGCGCACTTTCACCCGTCT  
CCGGCCATGGGCGGCTTTGGACTGAAACACCCGCCTCCTATGATGCTCATAAAAACA  
CGCCTGTACCTGGAAATATCACCAGCTTCAGCGACGTGCCGGTAAGCTCATTATCACC  
CAGTACTCCACTGGACAGGTCACCGTGGAGATGGAGTGGGAGCTGAAGAAGGAAAAC  
AGCAAGCGCTGGAATCCCGAGATCCAGTACACAAACAACACTACAACGACCCCCAGTTT  
TGGACTTTGCTCCCGACAGCACCGGAGAATATAGAACCACCCGCCCATTTGGCACCCG  
TTACCTACCCGTCCCCTGTAA

lcoAAV6

ATGGCTGCCGATGGTTATCTTCCAGATTGGCTCGAGGACAACCTCTCTGAAGGCATTCG  
CGAGTGGTGGGACTTGAAACCTGGAGCCCCGAAACCCAAAGCCAACCAGCAAAAGCA  
GGACGACGGCCGGGGTCTTGTGCTTCCCTGGTTACAAGTACCTCGGACCCTTCAACGGAC  
TCGACAAGGGGGAGCCCGTCAACGCGGGCGGACGCAGCGGCCCTCGAGCACGACAAGG  
CCTACGACCAGCAGCTCAAGGCGGGTGACAACCCGTACCTCCGGTACAACCACGCCGA  
CGCCGAGTTTCAGGAGCGTCTGCAAGAAGATACGTCTTTTGGGGGCAACCTCGGGCGA  
GCAGTCTTCCAGGCCAAGAAGAGGGTTCTCGAACCTTTTGGTCTGGTTGAGGAAGGCG  
CTAAGACGGCTCCTGGAAAGAAGCGTCCGGTAGAGCAGTCTCCACAGGAGCCAGACTC  
CTCCTCGGGCATCGGCAAGACAGGCCAGCAGCCCGCTAAAAAGAGACTCAATTTTGGT  
CAGACTGGCGACTCAGAGTCAGTCCCCGACCCTCAACCTCTCGGAGAACCTCCAGCAA  
CCCCCGCTGCTGTGGGACCTACTACAATGGCTTCAGGCGGTGGCGCACCAATGGCAGA  
CAATAACGAAGGCGCCGACGGAGTGGGTAATGCCTCGGGAAATTGGCATTGCGATTCC  
ACATGGCTGGGCGACAGAGTCATCACCACCAGCACCCGAACCTGGGGCCCTGCCACCT  
ACAACAACCACCTCTACAAGCAAATCTCCAGTGCTTCAACGGGAGCCAGCAACGACAA  
CCACTACTTCGGCTACAGCACCCCTGGGGGTATTTTACTTCAACAGATTCCACTGCC  
ACTTCTCACCACGTGACTGGCAGCGACTCATCAACAACAACCTGGGGATTCCGGCCCAA  
GAGACTCAACTTCAAGCTCTTCAACATCCAAGTCAAGGAGGTCACGACGAATGATGGC  
GTCACGACCATCGCCAATAACCTTACCAGCACGGTTCAAGTGTTTTCGGACTCGGAGTA  
CCAGCTCCCGTACGTCTCGGCTCTGCGCACCCAGGGCTGCCTCCCTCCGTTCCCGGCGG  
ACGTCTTCATGATTCCGCGAGTACGGCTACCTGACGCTGAACAACGGCAGCCAGGCCGT  
GGGACGCTCATCCTTTTACTGCCTGGAATACTTCCCTTCGCAGATGCTGAGAACGGGCA  
ACAACCTTTACCTTCAGCTACACCTTTGAGGACGTGCCTTTCCACAGCAGCTACGCTCAC  
AGCCAGAGCCTGGACCGGCTGATGAATCCTCTCATCGACCAGTACCTGTACTACCTGA  
ACAGAACTCAAAATCAGTCCGGAAGTGCCCAAACAAGGACTTGCTGTTTAGCCGTGG  
GTCTCCTGCTGGCATGTCTGTTTACGCCAAAACCTGGCTACCTGGACCCTGTTACCGGC  
AGCAGCGCGTTTTCAAAGACAAAACAGACAACAACAACAGCAACTTTACCTGGACTGG  
TGCTTCAAATATAACCTCAATGGCCGTGAATCTATCATCAATCCTGGCACTGCTATGG  
CCTCACACAAAGACGACAAAGACAAGTTCTTTCCCATGAGCGGTGTCATGATTTTTGGC  
AAAGAGAGCGCCGGAGCTTCAAACACTGCATTGGACAATGTCATGATTACCGACGAAG  
AGGAAATTAAGCCACTAACCCTGTGGCCACGGAGAGATTTGGGACTGTGGCAGTCAA  
CCTCCAGAGCAGCAGCACAGACCCTGCGACCGGAGATGTCCATGTTATGGGAGCCTTA  
CCTGGCATGGTGTGGCAAGACAGAGACGTGTACCTGCAGGGTCCCATTTGGGCCAAGA  
TTCCTCACACGGATGGACACTTTCACCCGTCTCCGCTGATGGGCGGCTTTGGACTGAAA  
CACCCGCCTCCTCAGATCCTCATAAAAACACGCCTGTACCTGCGAATCCTCCGGCGGA  
GTTACAGCGCTACAAAGTTTGCTTCAATCATCACCCAGTACTCCACTGGACAGGTCAGCG



TGGAGATTGAGTGGGAGCTGCAGAAGGAAAACAGCAAGCGCTGGAATCCCGAGGTGC  
AGTACACATCCAACCTACGCAAAATCTGCCAATGTGGACTTTACTGTGGACAACAATGG  
ACTTTATACTGAGCCTCGCCCCATTGGCACCCGTTACCTCACCCGTCCCCTGTAA

lcoAAV7

ATGGCTGCCGATGGTTATCTTCCAGATTGGCTCGAGGACAACCTCTCTGAAGGCATTTCG  
CGAGTGGTGGGACTTGAAACCTGGAGCCCCGAAACCCAAAGCCAACCAGCAAAAAGCA  
GGACAACGGCCGGGGTCTTGTGCTTCTGGTTACAAGTACCTCGGACCCTTCAACGGAC  
TCGACAAGGGGGAGCCCGTCAACGCGGGCAGCAGCGGCCCTCGAGCACGACAAGG  
CCTACGACCAGCAGCTCAAGGCGGGTGACAACCCGTACCTCCGGTACAACCACGCCGA  
CGCCGAGTTTCAGGAGCGTCTGCAAGAAGATACTGCTTTTGGGGGCAACCTCGGGCGA  
GCAGTCTTCCAGGCCAAGAAGAGGGTTCTCGAACCTCTTGGTCTGGTTGAGGAAGGCG  
CTAAGACGGCTCCTGCAAAGAAGCGTCCGGTAGAGCCATCTCCACAGAGATCTCCAGA  
CTCCTCCACGGGCATCGGCAAGAAAGGCCAGCAGCCCGCTAGAAAGAGACTCAATTTT  
GGTCAGACTGGCGACTCAGAGTCAGTCCCCGACCCTCAACCTCTCGGAGAACCTCCAG  
CAGCCCCCTTAGTGTGGGATCTGGTACAGTGGCTGCAGGCGGTGGCGCACCAATGGC  
AGACAATAACGAAGGCGCCGACGGAGTGGGTAATGCCTCGGGAAATTGGCATTGCGAT  
TCCACATGGCTGGGCGACAGAGTCATCACCACCAGCACCCGAACCTGGGGCCCTGCCCA  
CCTACAACAACCACCTCTACAAGCAAATCTCCAGCGAAACAGCAGGGAGCACCAACGA  
CAACACCTACTTCGGCTACAGCACCCCCTGGGGGTATTTTGACTTCAACAGATTCCACT  
GCCACTTCTCACCACGTGACTGGCAGCGACTCATCAACAACAACCTGGGGATTCCGGCC  
CAAGAACTCCGGTTCAAGCTCTTCAACATCCAAGTCAAGGAGGTCACGACGAATGAT  
GGCGTCACGACCATCGCCAATAACCTTACCAGCACGATCCAAGTGTTCGGACTCGG  
AGTACCAGCTCCCGTACGTCTCGGCTCTGCGCACCAGGGCTGCCTCCCTCCGTTCCCG  
GCGGACGTCTTCATGATTCCGCAGTACGGCTACCTGACGCTGAACAACGGCAGCCAGT  
CTGTGGGACGCTCATCCTTTTACTGCCTGGAATACTTCCCTTCGCAGATGCTGAGAACG  
GGCAACAACCTTTGAATTCAGCTACAGTTTTGAGGACGTGCCTTTCCACAGCAGCTACGC  
TCACAGCCAGAGCCTGGACCGGTGATGAATCCTCTCATCGACCAGTACCTGTACTACC  
TGGCCAGAACTCAAAGTAACCCAGGAGGAACCGCCGGGAACCGGGAATTGCAGTTTTA  
CCAGGGGGGACCTAGTACAATGGCCGAACAGGCCAAAAACTGGCTACCTGGACCCTGT  
TTCCGGCAGCAGCGGTTTCAAAGACACTGGATCAAAAACAACAACAGCAACTTTGCCT  
GGACTGGTGTACCAAATATCATCTCAATGGCCGTAATTCTCTGGTGAATCCTGGCGTC  
GCTATGGCCACGCACAAGACGACGAAGACCGTTTCTTTCCAGCAGCGGTGTCCTCA  
TTTTTGGCAAACTGGCGCCACGAACAAAACCACTTTGGAAAATGTCCTCATGACCAA  
CGAAGAGGAAATTAGGCCGACTAACCCGTGGCCACGGAGGAATATGGGATCGTGTCT  
AGCAACCTCCAGGCGGCCAACACAGCTGCACAAACCCAAAGTTGTCAACAACCAGGGA  
GCCTTACCTGGCATGGTGTGGCAAAACAGAGACGTGTACCTGCAGGGTCCCATTGGG  
CCAAGATTCTCACACGGATGGAAACTTTCACCCGTCTCCGCTGATGGGCGGCTTTGGA  
CTGAAACACCCGCCTCCTCAGATCCTCATCAAAAACACGCCTGTACCTGCGAATCCTCC  
GGAGGTGTTCACTCCGGCAAAGTTTGCTTCATTCATCACCCAGTACTCCACTGGACAGG  
TCAGCGTGGAGATTGAGTGGGAGCTGCAGAAGGAAAACAGCAAGCGCTGGAATCCCG  
AGATCCAGTACACATCCAACCTTTGAAAAACAACAGGTGTGGACTTTGCTGTGGACAG  
CCAGGGAGTGTATAGTGAGCCTCGCCCCATTGGCACCCGTTACCTCACCCGTAATCTGT  
AA

lcoAAV8

ATGGCTGCCGATGGTTATCTTCCAGATTGGCTCGAGGACAACCTCTCTGAAGGCATTTCG  
CGAGTGGTGGGCTTTGAAACCTGGAGCCCCGAAACCCAAAGCCAACCAGCAAAAAGCA

GGACGACGGCCGGGGTCTTGTGCTTCCTGGTTACAAGTACCTCGGACCCTTCAACGGAC  
TCGACAAGGGGGAGCCCGTCAACGCGGGCGGACGCAGCGGCCCTCGAGCACGACAAGG  
CCTACGACCAGCAGCTCCAGGCGGGTGACAACCCGTACCTCCGGTACAACCACGCCGA  
CGCCGAGTTTCAGGAGCGTCTGCAAGAAGATACGTCTTTTGGGGGCAACCTCGGGCGA  
GCAGTCTTCCAGGCCAAGAAGAGGGTTCTCGAACCTCTTGGTCTGGTTGAGGAAGGCG  
CTAAGACGGCTCCTGGAAAGAAGCGTCCGGTAGAGCCATCTCCACAGAGATCTCCAGA  
CTCCTCCACGGGCATCGGCAAGAAAGGCCAGCAGCCCGCTAGAAAGAGACTCAATTTT  
GGTCAGACTGGCGACTCAGAGTCAGTCCCCGACCCTCAACCTCTCGGAGAACCTCCAG  
CAGCCCCCTCTGGTGTGGGACCTAATAACAATGGCTGCAGGCGGTGGCGCACCAATGGC  
AGACAATAACGAAGGCGCCGACGGAGTGGGTAGTTCCTCGGGAAATTGGCATTGCGAT  
TCCACATGGCTGGGCGACAGAGTCATCACCACCAGCACCCGAACCTGGGCCCTGCCCA  
CCTACAACAACCACCTCTACAAGCAAATCTCCAACGGGACATCAGGAGGAGCCACCAA  
CGACAACACCTACTTCGGCTACAGCACCCCCTGGGGGTATTTTGACTIONCAACAGATTCC  
ACTGCCACTTCTCACCACGTGACTGGCAGCGACTCATCAACAACAACCTGGGGATTCCG  
GCCCAAGAGACTCAGCTTCAAGCTCTTCAACATCCAAGTCAAGGAGGTACGCAGAAT  
GAAGGCACGAAGACCATCGCCAATAACCTTACCAGCACGATCCAAGTGTTTACGGACT  
CGGAGTACCAGCTCCCGTACGTCTCGGCTCTGCGCACCAGGGTGCCTCCCTCCGTTC  
CCGGCGGACGTCTTCATGATTCCGCAGTACGGCTACCTGACGCTCAACAACGGCAGCC  
AGGCCGTGGGACGCTCATCTTTTACTGCCTGGAATACTTCCCTTCGCAGATGCTGAGA  
ACGGGCAACAACCTTTCAGTTCACGTACACCTTTGAGGACGTGCCTTTCCACAGCAGCTA  
CGCTCACAGCCAGAGCCTGGACCGGTGATGAATCCTCTCATCGACCAGTACCTGTACT  
ACCTGAGCAGAACTCAAACCTACCGGAGGAACCGCCAATACTCAGACCTTGGGCTTTAG  
CCAGGGGGGACCTAATAACAATGGCCAACCAGGCCAAAACCTGGCTACCTGGACCCTGT  
TACCGGCAGCAGCGCGTTTCAACGACAACCGGGCAAAACAACAACAGCAACTTTGCCT  
GGACTGCGGGGACCAAATATCATCTCAATGGCCGTAATTCTCTGGCTAATCCTGGCATC  
GCTATGGCCACGCACAAAGACGACGAAGAACGTTTCTTTCCAGCAACGGTATCCTCA  
TTTTTGGCAAACAAAATGCCGCCAGAGACAACGCAGATTACAGCGATGTCATGCTCAC  
CAGCGAAGAGGAAATTAACCACTAACCTGTGGCCACGGAGGAATATGGGATCGT  
GGCAGATAACCTCCAGCAGCAAAACACAGCTCCTCAAATTGGAACGTCAACAGCCAG  
GGAGCCTTACCTGGCATGGTGTGGCAAACAGAGACGTGTACCTGCAGGGTCCCATT  
GGGCCAAGATTCTCACACGGATGAAAACCTTTCACCCGTCTCCGCTGATGGGCGGCTTT  
GGACTGAAACACCCGCCTCCTCAGATCCTCATCAAAAACACGCCTGTACCTGCGGATC  
CTCCGACCACCTTCAACCAGTCAAAGCTGAACTCATTATCACCCAGTACTCCACTGGA  
CAGGTCAGCGTGGAGATTGAGTGGGAGCTGCAGAAGGAAAACAGCAAGCGCTGGAAT  
CCCGAGATCCAGTACACATCCAACCTACTACAAATCTACATCTGTGGACTTTGCTGTGAA  
TACTGAAGGAGTGTATAGTGAGCCTCGCCCCATTGGCACCCGTTACCTCACCCGTAATC  
TGTA

lcoAAV9

ATGGCTGCCGATGGTTATCTTCCAGATTGGCTCGAGGACAACCTCTCTGAAGGCATTCCG  
CGAGTGGTGGGCTTTGAAACCTGGAGCCCCGCAACCCAAAGCCAACCAGCAACATCAG  
GACAACGCTCGGGGTCTTGTGCTTCCTGGTTACAAGTACCTCGGACCCGGCAACGGACT  
CGACAAGGGGGAGCCCGTCAACGCGGGCGGACGCAGCGGCCCTCGAGCACGACAAGGC  
CTACGACCAGCAGCTCAAGGCGGGTGACAACCCGTACCTCAAGTACAACCACGCCGAC  
GCCGAGTTTCAGGAGCGTCTGAAAGAAGATACGTCTTTTGGGGGCAACCTCGGGCGAG  
CAGTCTTCCAGGCCAAGAAGAGGGCTTCTCGAACCTCTTGGTCTGGTTGAGGAAGCGGC  
TAAGACGGCTCCTGGAAAGAAGCGTCCGGTAGAGCAGTCTCCACAGGAGCCAGACTCC  
TCCGCGGGCATCGGCAAGTCCGGCGCACAGCCCGCTAAAAGAGACTCAATTTTGGTC

AGACTGGCGACACAGAGTCAGTCCCCGACCCTCAACCTATCGGAGAACCTCCAGCAGC  
CCCCTCTGGTGTGGGATCTCTTACAATGGCTTCAGGCGGTGGCGCACCAGTCGCAGACA  
ATAACGAAGGCGCCGACGGAGTGGGTAGTTCCTCGGGAAATTGGCATTGCGATTCCCA  
ATGGCTGGGCGACAGAGTCATCACCACCAGCACCCGAACCTGGGCCCTGCCACCTAC  
AACACCACCTCTACAAGCAAATCTCCAACAGTACATCAGGAGGAAGCAGCAACGCAC  
AACGCCTACTTCGGCTACAGCACCCCTGGGGGTATTTTACTTCAACAGATTCCACTG  
CCACTTCTCACCACGTGACTGGCAGCGACTCATCAACAACAACCTGGGGATTCCGGCCC  
AAGAGACTCAACTTCAAGCTCTTCAACATCCAAGTCAAGGAGGTCACGGACAATAACG  
GCGTCAAGACCATCGCCAATAACCTTACCAGCACGGTTCAAGTGTTCACGGACTCGGA  
CTACCAGCTCCCGTACGTCTCGGCTCTGCGCACGAGGGTGCCTCCCTCCGTTCCCGG  
CGGACGTCTTCATGATTCCGCAGTACGGCTACCTGACGCTCAACGATGGCAGCCAGGC  
CGTGGGACGCTCATCCTTTTACTGCCTGGAATACTTCCCTTCGCAGATGCTGAGAACGG  
GCAACAACCTTTCAGTTCAGCTACGAGTTTGAGAACGTGCCTTTCCACAGCAGCTACGCT  
CACAGCCAGAGCCTGGACCGGCTGATGAATCCTCTCATCGACCAGTACCTGTACTACCT  
GAGCAAGACTATTAATGGATCTGGACAGAATCAACAGACCTTGAAATTTAGCGTGGCC  
GGACCTAGTAACATGGCCGTTTCAGGGAAGAACTACATACCTGGACCCTCATACCGGC  
AGCAGCGCGTTTCAACGACAGTGACACAAAACAACAACAGCGAATTTGCCTGGCCTGG  
TGCTTCATCTTGGGCTCTCAATGGCCGTAATTCTCTGATGAATCCTGGCCCGGCTATGG  
CCTCACACAAAGAAGGAGAAGACCGTTTCTTTCCCCTGAGCGGTTCTCTCATTTTTGGC  
AAACAAGGCACAGGAAGAGACAACGTGGATGCGGACAAGGTCATGATTACCAACGAA  
GAGGAAATTAACCACTAACCTGTGGCCACGGAGTCCATGGGCAGGTGGCAACCA  
ACCACCAGAGCGCCAAGCACAAAGCACAAACCGGATGGGTCCAAAACCAGGGAATCT  
TACCTGGCATGGTGTGGCAAGACAGAGACGTGTACCTGCAGGGTCCCATTTGGGCCAA  
GATTCCTCACACGGATGGAAACTTTCACCCGTCTCCGCTGATGGGCGGCTTTGGAATGA  
AACACCCGCTCCTCAGATCCTCATCAAAAACACGCCTGTACCTGCGGATCCTCCGACC  
GCCTTCAACAAGGACAAGCTGAACTCATTCATCACCCAGTACTCCACTGGACAGGTCA  
GCGTGGAGATTGAGTGGGAGCTGCAGAAGGAAAACAGCAAGCGCTGGAATCCCGAGA  
TCCAGTACACATCCAATACTACAAATCTAACAATGTGGAATTTGCTGTGAATACTGAA  
GGAGTGTATAGTGAGCCTCGCCCCATTGGCACCCGTTACCTCACCCGTAATCTGTAA

lcoAAV10

ATGGCTGCCGATGGTTATCTTCCAGATTGGCTCGAGGACAACCTCTCTGAAGGCATTTCG  
CGAGTGGTGGGACTTGAAACCTGGAGCCCCGAAACCCAAAGCCAACCAGCAAAAAGCA  
GGACGACGGCCGGGGTCTTGTGCTTCTGGTTACAAGTACCTCGGACCCTTCAACGGAC  
TCGACAAGGGGGAGCCCGTCAACGCGGGCGGACGCAGCGGCCCTCGAGCACGACAAGG  
CCTACGACCAGCAGCTCAAGGCGGGTGACAACCCGTACCTCCGGTACAACCACGCCGA  
CGCCGAGTTTCAGGAGCGTCTGCAAGAAGATACTGCTTTTGGGGGCAACCTCGGGCGA  
GCAGTCTTCCAGGCCAAGAAGAGGGTTCTCGAACCTCTTGGTCTGGTTGAGGAAGCGG  
CTAAGACGGCTCCTGGAAAGAAGCGTCCGGTAGAGCCATCTCCACAGAGATCTCCAGA  
CTCCTCCACGGGCATCGGCAAGAAAGGCCAGCAGCCCGCTAAAAGAGACTCAATTTT  
GGTCAGACTGGCGAGTCAGAGTCAGTCCCCGACCCTCAACCTATCGGAGAACCTCCAG  
CAGGCCCTCTGGTTTGGGATCTGGTACAATGGCTGCAGGCGGTGGCGCACCAATGGC  
AGACAATAACGAAGGCGCCGACGGAGTGGGTAGTTCCTCGGGAAATTGGCATTGCGAT  
TCCACATGGCTGGGCGACAGAGTCATCACCACCAGCACCCGAACCTGGGCCCTGCCCA  
CCTACAACAACCACCTCTACAAGCAAATCTCCAACGGCACATCAGGAGGAAGCACCAA  
CGACAACACCTACTTCGGCTACAGCACCCCTGGGGGTATTTTACTTCAACAGATTCC  
ACTGCCACTTCTCACCACGTGACTGGCAGCGACTCATCAACAACAACCTGGGGATTCCG  
GCCAAGAGACTCAGTTCAAGCTCTTCAACATCCAAGTCAAGGAGGTCACGCAGAAT

GAAGGCACGAAGACCATCGCCAATAACCTTACCAGCACGATCCAAGTGTTTACGGACT  
CGGAGTACCAGCTCCCGTACGTCCCTCGGCTCTGCGCACCAGGGCTGCCTCCCTCCGTTT  
CCGGCGGACGTCTTCATGATTCCGCAGTACGGCTACCTGACGCTGAACAACGGCAGCC  
AGGCCGTGGGACGCTCATCTTTTACTGCCTGGAATACTTCCCTTCGCAGATGCTGAGA  
ACGGGCAACAACCTTTGAATTCAGCTACACCTTTGAGGACGTGCCTTTCCACAGCAGCTA  
CGCTCACAGCCAGAGCCTGGACCGGCTGATGAATCCTCTCATCGACCAGTACCTGTACT  
ACCTGAGCAGAACTCAATCCACCGGAGGAACCCAGGGGACTCAGCAATTGCTGTTTAG  
CCAGGCCGGACCTGCTAACATGTCTGCTCAGGCCAAAACTGGCTACCTGGACCCTGTT  
ACCGGCAGCAGCGCGTTTCAACGACACTGTCGCAAAAACAACAACAGCAACTTTGCCTG  
GACTGGTGCTACCAAATATCATCTCAATGGCCGTGACTCTCTGGTGAATCCTGGCGTCG  
CTATGGCCACGCACAAAGACGACGAAGAACGTTTCTTTCCCAGCAGCGGTGTCCTCAT  
GTTTGGCAAACAAGGCGCCGGAAGAGACAACGTGGATTACAGCAGCGTCATGCTCACC  
AGCGAAGAGGAAATTAACCCTAACCCTGTGGCCACGGAGCAGTATGGGGTGGTG  
GCAGATAACCTCCAGCAGGCCAACACAGGGCCTATTGTGGGAAATGTCAACAGCCAGG  
GAGCCTTACCTGGCATGGTGTGGCAAAACAGAGACGTGTACCTGCAGGGTCCCATTG  
GGCCAAGATTCCCTCACACGGATGGAAACTTTCACCCGTCTCCGCTGATGGGCGGCTTTG  
GACTGAAACACCCGCCTCCTCAGATCCTCATAAAAACACGCCTGTACCTGCGGATCCT  
CCGACCACCTTCAGCCAGGCAAAGCTGGCTTCATTCATACCCAGTACTCCACTGGACA  
GGTCAGCGTGGAGATTGAGTGGGAGCTGCAGAAGGAAACAGCAAGCGCTGGAATCC  
CGAGATCCAGTACACATCCAATACTACAAATCTACAAATGTGGACTTTGCTGTGAATA  
CTGAAGGAACTTATAGTGAGCCTCGCCCCATTGGCACCCGTTACCTCACCCGTAATCTG  
TAA

lcoAAV11

ATGGCTGCCGATGGTTATCTTCCAGATTGGCTCGAGGACAACCTCTCTGAAGGCATTTCG  
CGAGTGGTGGGACTTGAAACCTGGAGCCCCGAAACCCAAAGCCAACCAGCAAAAGCA  
GGACGACGGCCGGGTCTTGTGCTTCTGGTTACAAGTACCTCGGACCCTTCAACGGAC  
TCGACAAGGGGGAGCCCGTCAACGCGGGCAGCAGCGGCCCTCGAGCACGACAAGG  
CCTACGACCAGCAGCTCAAGGCGGGTGACAACCCGTACCTCCGGTACAACCACGCCGA  
CGCCGAGTTTCAGGAGCGTCTGCAAGAAGATACTGCTTTTGGGGGCAACCTCGGGCGA  
GCAGTCTTCCAGGCCAAGAAGAGGGTTCTCGAACCTCTTGGTCTGGTTGAGGAAGGCG  
CTAAGACGGCTCCTGGAAAGAAGCGTCCGTTGGAGTCTCCACAGGAGCCAGACTCCTC  
CTCGGGCATCGGCAAGAAAGGCAAACAGCCCGCTAGAAAGAGACTCAATTTTGAAGA  
GGACTGAGCAGGCGACGGACCCCTGAGGGATCAGATACCAGCGCCATGTCTTCT  
GATATTGAGATGCGTGCAGCTCCGGGCGGTAATGCAGTGCAGCGGGACAAGGCTCCG  
ACGGAGTGGGTAATGCCTCGGGAGATTGGCATTGCGATTCCACATGGTCTGAGGGCAA  
GGTCACGACCACCAGCACCCGAACCTGGGTCTGCCACCTACAACAACCACCTCTAC  
CTGCGACTCGGAACAACAAGCAGCTCCAACACCTACAACGGCTTCAGCACCCCTGGG  
GGTATTTGACTTCAACAGATTCCACTGCCACTTCTCACCACGTGACTGGCAGCGACTC  
ATCAACAACAACCTGGGGACTACGGCCCAAGGCCATGCGGGTCAAGATCTTCAACATCC  
AAGTCAAGGAGGTCACGACGTGAACGGCGAGACGACCGTGGCCAATAACCTTACCA  
GCACGGTTCAAATCTTTGCGGACTCGTCGTACGAACTCCCGTACGTTCATGGATGCGGGT  
CAAGAGGGCAGCCTCCCTCCGTTCCCGAACGACGTCTTCATGGTGCCGCAGTACGGCT  
ACTGTGGAATCGTGACCGGCGAGAATCAGAATCAGACTGACCGCAATGCCTTTTACTG  
CCTGGAATACTTCCCTTCGCAGATGCTGAGAACGGGCAACAACCTTTGAAATGGCTTAC  
AACTTTGAGAAGGTGCCTTTCCACAGCATGTACGCTCACAGCCAGAGCCTGGACCGGC  
TGATGAATCCTCTCCTGGACCAGTACCTGTGGCACCTGCAATCGACTACCTCTGGAGAG  
ACCCTGAATCAAGGGAATGCCGCAACCACATTTGGAAAGATCCGGAGTGGGGACTTTG

CCTTTTACAGAAAAAACTGGCTACCTGGACCCTGTGTTAAGCAGCAGCGCTTCTCAAAG  
ACAGCTAGTCAAAAACACAAGATCCCTGCCAGCGGGGGCAACGCTCTCTTAAAATACG  
ACACCCACTATACTCTCAATAACCGTTGGTCTAACATCGCGCCTGGCCCGCCAATGGCC  
ACGGCTGGACCTTCGGACGGGGACTTCAGCAACGCCAGCTCATTTTTCTGGCCCTTC  
TGTTACAGGAAACACAACCACTTCAGCGAACAATCTGCTCTTCACCAGCGAAGAGGAA  
ATTGCAGCCACTAACCCCTAGAGATACGGACATGTTTGGGCAGATTGCAGATAACAACC  
AGAATGCCACCACAGCTCCTATAACCGGAAACGTCACAGCTATGGGAGTTTTACCTGG  
CATGGTGTGGCAAAACAGAGACATTTACTACCAGGGTCCCATTTGGGCCAAGATTCTT  
CACGCGGATGGACACTTTCACCCGTCTCCGCTGATTGGCGGCTTTGGACTGAAACACCC  
GCCTCCTCAGATCTTTATCAAAAACACGCCTGTACCTGCGAATCCTGCAACCACCTTCA  
CTGCTGCAAGAGTAGACTCATTCATCACCCAGTACTCCACTGGACAGGTCGCTGTGCAG  
ATTGAGTGGGAGATCGAAAAGGAACGGAGCAAGCGCTGGAATCCCGAGGTGCAGTTT  
ACATCCAACACTACGGAAACCAATCTTCTATGTTGTGGGCTCCCGACACTACCGGAAAAT  
ATACTGAGCCTCGCGTTATTGGCTCTCGTTACCTACCAATCACCTGTAA

lcoAAV12

ATGGCTGCCGATGGTTATCTTCCAGATTGGCTCGAGGACAACCTCTCTGAAGGCATTTCG  
CGAGTGGTGGGCTTTGAAACCTGGAGCCCCGCAACCCAAAGCCAACCAGCAACATCAG  
GACAACGGCCGGGGTCTTGTGCTTCTGGTTACAAGTACCTCGGACCCTTCAACGGACT  
CGACAAGGGGGAGCCCGTCAACGAGGCGGACGCAGCGGCCCTCGAGCACGACAAGGC  
CTACGACAAGCAGCTCGAGCAGGGTGACAACCCGTACCTCAAGTACAACCACGCCGAC  
GCCGAGTTTCAGCAGCGTCTGGCCACCGATACGTCTTTGGGGGCAACCTCGGGCGAG  
CAGTCTTCCAGGCCAAGAAGAGGATCCTCGAACCTCTTGGTCTGGTTGAGGAAGGCGT  
TAAGACGGCTCCTGGAAAGAAGCGTCCGTTGGAGAAGACTCCAAATAGACCGACCAAC  
CCAGACTCCGGGAAGGCCCCCGGCCAAGAAAAAGCAGAAAGACGGCGAACCCAGCCGAC  
TCCGCTAGAAGGACTCTCGACTTTGAGGACTCTGGAGCAGGCGACGGACCCCTGAGG  
GATCATCTTCCGGAGAAATGTCTCATGACGCTGAGATGCGTGCAGCTCCAGGCGGTAA  
TGCAGTCGAGGCGGGACAAGGCGCCGACGGAGTGGGTAATGCCTCGGGAGATTGGCA  
TTGCGATTCCACATGGTCTGAGGGCAGAGTCACGACCACCAGCACCCGAACCTGGGTC  
CTGCCACCTACAACAACCACCTCTACCTGCGAATCGGAACAACGGCCAACCTCCAACA  
CCTACAACGGCTTCAGCACCCCTGGGGGTATTTTGACTTCAACAGATTCCACTGCCAC  
TTCTCACCACGTGACTGGCAGCGACTCATCAACAACAACCTGGGGACTCCGGCCCAAGT  
CCATGCGGGTCAAGATCTTCAACATCCAAGTCAAGGAGGTCACGACGTGGAACGGCGA  
GACGACCGTGGCCAATAACCTTACCAGCACGGTTCAAATCTTTGCGGACTCGACGTAC  
GAACTCCCGTACGTGATGGATGCGGGTCAAGAGGGCAGCTTTCCTCCGTTCCCGAACG  
ACGTCTTCATGGTGC CGCAGTACGGCTACTGTGGAGTTGTGACCGGCAAAAACCAGAA  
TCAGACTGACCGCAATGCCTTTTACTGCCTGGAATACTTCCCTTCGCAGATGCTGAGAA  
CGGGCAACAACCTTTGAAGTCAGCTACCAATTTGAGAAGGTGCCTTTCCACAGCATGTA  
CGCTCACAGCCAGAGCCTGGACCGGATGATGAATCCTCTCCTGGACCAGTACCTGTGG  
CATCTGCAATCGACTACCACTGGAAATTCCCTGAATCAGGGGACTGCCACCACCACGT  
ACGGGAAGATTACCACTGGGGACTTTGCCTACTACAGGAAAAACTGGCTACCTGGAGC  
CTGTATCAAGCAGCAGAAATCTCAAAGAATGCTAACCAAAAACCTACAAGATCCCTGCC  
TCGGGGGGAGACGCTCTCTTAAAATATGACACGCACACCCTCTCAATGGCCGTTGGT  
CTAACATGGCTCCTGGCCCGCCAATGGCCACGGCTGGAGCCGGAGACAGCGATTTTCAG  
CAACAGCCAGCTCATTTTTGCGGGCCCTAATCCGTCAGGAAACACAACCACTTCTTCAA  
ACAATCTGCTCTTCACCAGCGAAGAGGAAATTGCAACCACTAACCCCTCGAGATACGGA  
CATGTTTGGGCAGATTGCAGATAACAACCAGAATGCCACCACAGCTCCTCACATTGCA  
AACCTGGACGCTATGGGAATCGTGCCTGGCATGGTGTGGCAAAACAGAGACATTTACT

ACCAGGGTCCCATTTGGGCCAAGGTCCCTCACACGGATGGACACTTTCACCCGTCTCCG  
CTGATGGGCGGCTTTGGACTGAAACACCCGCCTCCTCAGATCTTTATCAAAAACACGCC  
TGTACCTGCGAATCCTAATACCACCTTCAGCGCTGCAAGGATTAACCTATTCTGACCC  
AGTACTCCACTGGACAGGTGCGCGTGCAGATTGACTGGGAGATCCAGAAGGAACATAG  
CAAGCGCTGGAATCCCGAGGTGCAGTTTACATCCAACCTACGGAACCTAAAACCTCTATG  
TTGTGGGCTCCCGACAACGCTGGAACTATCACGAGCTCCGCGCTATTGGCTCCCGTTT  
CCTCACCCACCACCTGTAA

lco-mAAV1

ATGTCTTTTTTAGAAGCGTTTGAGGATTGGTACGAGAAAGCAGCGGCTACTTGGCGAC  
ATTTGGAACCTGGAGCCCCGCGTCCCAAAGCCAACCAGCAACATCAGGAACAGCATCA  
TCCGGTTCCTGCTGAAGAGCCTAAAGACCAAGCTCGGGGTCTTGTGCTTCTGGTTACA  
AGTACCTCGGACCCTTCAACGGACTCGACAAGGGGGATCCCGTCAACCAAGCGGACGC  
AGCGGCCCTCGAGCACGACAAGGCCTACAACCACCTTCTCGAGGAAGGTCAAACCCG  
TACCTCGTGTACAACGAGGCCGACAAGCATTTCAGGAGACTCTGCAAGGCGATACGT  
CTTTGGGGGCAACCTCGGGAAGGCAGTCTTCCAGGGCAAGAAGAGGGTTCTCGAAC  
TTTTGGTCTGGTTGACGAGGAACCTCACGAGCTGGCTCCTCCTCAAAGAAGAAGACA  
AAACAGGAATACAAAGACACTCTAGAGGCTATTCCTCCTCCTAGCAGAGAGGAACAGA  
CTCCCAGAAAGGATCATCAGCTTCCAAAACGGAGCCTCATCTTCAGCAGCAGCAGC  
AGCCCCCTCTAATTTGGGATCTGGTATCATGGCTGAAGGCGGTGGCGCACCAATGGGC  
GACAATCAACAAGGCGCCGACGGAGTGGGTAATGCCTCGGGAAATTGGCATTGCGATT  
CCCCTGGATGGGCGACAAAGTCGTCACCCGCACCACCCGAACCTGGGTCTGCCCAC  
CTACAACAACCACCTTACCAAGCCATCGACGAGAATACAACCTCTCGGATCTGCCAAC  
AACTTCTACGGCTTCAGCACCCCCTGGGGGTATTTGACTTCAACAGATTCCACTGCCA  
CTTCTCACCACGTGACTGGCAGCGACTCATCAACAACAACCTGGGGAATCCGGCCCCGG  
TCCCTCCGGTTCAAGCTCTTCAACATCCAAGTCAAGGAGGTCACGACGACGTCGGGGC  
AGACGACCATCGCCAATAACCTTACCAGCACGGTTCAAGTGTTTGC GGACGAAGAGAT  
GCACCTCCCGTACGTCTCGGCTCTGCGCACGACGGCTGCTTTCCTCCGTTCCCGCCGG  
ACATTTACATGCTGCCGAGTACGGCTACTGTACGCTCGACTATCAGGGACTCACCCT  
GACCGCTCAGCCTTTTACTGCCTGGAATACTTCCCTTCGCAGATGCTGAGAACGGGCAA  
CAACTTTGAACTTACGTACAACCTTTGAGAAGCTGCCTTTCCACAGCATGTGGATGCACA  
ACCAGAGCCTGGACCGGATCATGAATCCTCTCATCGACCAGTACCTGTACCGCTTCGCC  
TCGAAGACCGGAAACACCTGGACATAACAAAAGGGGTCTAAAGACGACAAGACCGCT  
CAGGCCAGAACTGGCTACCTGGACCCTCAATCCGGAATCAGCCTCTTACTCGAGTG  
GTAACCAAACCAACCTCAGTGGATACGATATCGCTCCAAAACAGAGGTCAATGAGAA  
ACAGATGACTGTGTTTCCTGGCCTTTCTATGGCCACGGAAAACGAAAGGAGCGGAACC  
ATCAAGGAGCAGCCACGAGCAACCTGCTCATTTTTGCGAACAAGCGGATGCCGCCA  
CCTCTCAGACCACCTCAAGCGTGGGCAGTACAGCGACTCTGCTCGTACCAACGAAAA  
CGAAGTCAAACCGTGAACCCTTCCGCCACGGAGGCGTGGGGGTCTGCTGCAGCCAAC  
AAACAGACAAGCGCTACAGCTTCTCAAAGCGTGGCTATTCATGCTCAGGGAGTTGTGC  
CTGGCATGGTGTGGCAAGACAGAGACATTTACTTTTACGGGTCCCATTTGGGCCAAGATT  
CCTCACACGGATGGACACTTTCACCCGTCTCCGTGATGGGCGGCTTTGGACTGAAACA  
CCCGCCTCCTCAGATCTTTATCAAAAACACGCCTGTACCTTCCAATCCTGCAACCACCT  
ACACCACCGCAAAGTACAACCTCATTTCATCACCCAGTACTCCACTGGACAGGTCACCGT  
GGAGATTGACTGGGAGCTGCAGAAGGAAACCAGCAAGAAGTGGAATCCCGAGATCCA  
GTTTACATCCAACCTACAACGGGACAGACACGCTGGGATTTGCTCCCGACGCGGCTGGA  
GACTATACTGAGCCTCGCGCTATTGGCACCCGTTACCTCACCCGTCCCCTGTAA

lco-mAAV-EVE1

ATGTCTTTTTTGGAGAAATTTGAGGATTGGTACGAGAAGTCAGCTGCTACTTGGAGACA  
CTTGGAAGCGGGACCACCGCATCCCAAAGCCAACCAGCAACATCAGGACGACAGCCAT  
GGTCTTGTGCTTCCTGGTTACAAGTACCTCATTCCCTTCAACGGACTCGACAAGGGGGA  
GCCCCGTCAACCAAGCGGACGAGGGCGGCCCTCGAGCACGACAAGGCCTACGACCAGTTA  
CTCAAGGAAGGTGACAACCCGTACCTCACCTACAACCACGCCGACCAAGAGTTTCAGG  
AGAAGCTGTGCGGAAGATACGTCTTTTGGGGGCAACCTCGGGAAGGCAGTCTTCCAGGG  
AAAGAAGAGGCTTCTCGAACCTCTTGGTCTGGTTGAGCCAGACCTGGCGCCTGTGAAA  
GGAGAACTCCTGAGAAGCTGCGCATCCCACAGCAGCTCCAAATCCCTCCTCCTCCATC  
TAAGCGACAAAAGACGAGAGGACTCCCTTTTAACCCAAACTCAGACAATGGAGCTTAC  
ACCAGCAGTCAACAGTCAGCCCCACAAATTTGGGATCTGGTATCATGGCTGAAGGCG  
GTGGCGCACCAATGGGCGACAATCAACAAGGCGCCGACGGAGTGGGTAATTCCTCGGG  
AAATTGGCATTGCGATTCCCAATGGATGGGCAACAGAGTCGTCACCCGAACAACCCGA  
ACCTGGGTCTGCCCACCTACAACAACCACCTCTACAAGCGAATCCAAAACAGTGTCA  
CCACGGGATCTGCCAACAACACTACTTCGGCTTCAGCACCCCTGGGGGTATTTTGACTTC  
AACAGATTCCACTGCCACTTCTACCACGTGACTGGCAGCGACTCATCAACAACAAC  
GGGACTGCGGCCCAAGTCCCTCCGGTTCAAGCTCTTCAACATCCAAGTCAAGGAGGT  
CACGACGACGAACGGCGAGACGACCATCGCCAATAACCTTACCAGCACGATCCAAGTG  
TTTGC GGACTCGGAGTACCAGCTCCCGTACGTCATCGGCTCTGCGCAAGAGGGCTGCCT  
CCCTCCGTTCCCGCCGGACGTCTTCATGCTGCCGCAGTACGGCTACTGTACGCTCGACA  
ACGATGGGAAAAGTTTAGAGCGCTCAGCCTTTTACTGCCTGGAATACTTCCCTTCGCAG  
ATGCTGAGAACGGGCAACAACCTTTGAATTCAGCTACGCTTTTGAGTCTGTGCCTTTCCA  
CAGCATGTGGATGCACAATCAGAGCCTGGACCGGCTGATGAATCCTCTCATCGACCAG  
TACCTGTACAGATTTGATAATCTAACCTCCGGAAATACCGTTAACCCACCTTCACTTA  
CAAAAAGGGGTCTGCGGGGGACATGGCCTCTCAGGCCAGAACTGGCTACCTGGACCC  
ATGCTTCGGAATCAGGGCCTTATGGATGGCCCTAACAATCAGGCCAATCTAGATGGTT  
GGAGGATCAGTCTCCAATGGTGTATCAATGGCAAAAGTTCTATCATCTTTCCTGGCCCCG  
TCCATGTATACCGCCCACAACGCTGCAGACGAACTGGAGGTTCAACCCAGCATTAACC  
TCCCTATTTTTGCTAAAGATGCGTCAGTACCTGAATCCACTATAATTAGCAGTATTGGT  
AATCAAGATCCTAATAGTAAATTGCTCGTCACCGACGAAAACGAAGTCGGGACCGTGA  
ACGCCACCGCCGCTAACACCTGGGGGTCTATGGCAGTCAACCAGCAGACTCCCACCCC  
CACTAGTGC GGGACAGGTTCTGAACCAATGGGAGTTATGCCTGGCATGGTGTGGCAA  
AACAGAGACATTTACCTGCAGGGTCCCATTTGGGCCAAGATTCTCACACGGATGGAC  
ACTTTCACCCGTCTCCGCTGATGGGCGGCTTTGGACTGAAACACCCGCCTCCTCAGATC  
ATGATCAAAAACACGCCTGTACCTGCGAATCCTGCAACCATCTTCACTCCGGTGAAGC  
AAAACCTCATTATCACCCAGTACTCCACTGGACAGGTCACCGTGGAGATTGAGTGGGA  
GCTGCAGAAGGAAACCAGCAAGAAATGGAATCCCGAGATCCAGTTTACATCCAACCTC  
AGAAACACTATTGACCTGCCTTTTGGCTCCCAATAACGAAGGAGTGTATAGTGAGCCTCG  
CCCATTGGCACCCGTTACCTCACCCGTCCCATCTAA
